# Supplementary material
Source: PubMed Central journal article supplement (PMC3435160)
Supplement: 1211509109_pnas.201211509SI.pdf [file 1211509109_pnas.201211509SI.pdf]

# Supporting Information

Shaked et al. 10.1073/pnas.1211509109

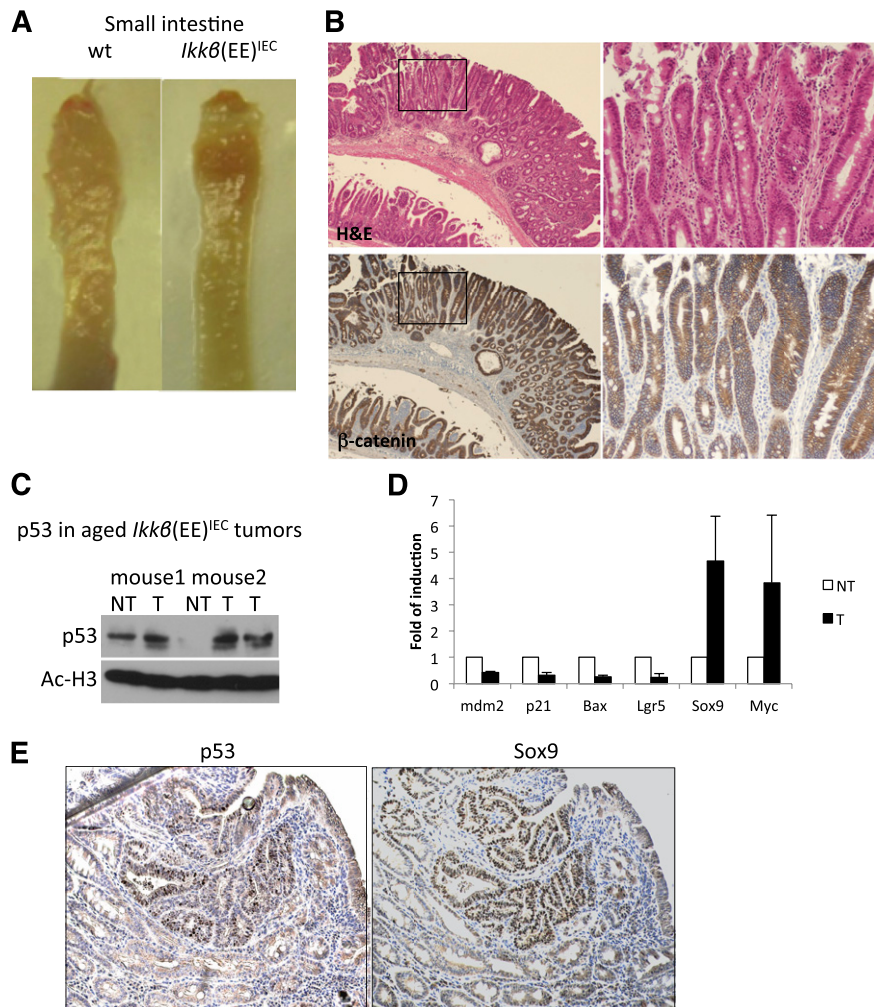

**Fig. S1.** Spontaneous tumors in mice expressing constitutively active IKK $\beta$  in their intestinal epithelial cells [*Ikk $\beta$ (EE)<sup>IEC</sup>* mice]. (A) Tumors in aged *Ikk $\beta$ (EE)<sup>IEC</sup>* mice; a representative pair of small intestines from 1-y-old WT and *Ikk $\beta$ (EE)<sup>IEC</sup>* mice are shown. (B) H&E staining (Upper) and  $\beta$ -catenin staining (Lower) of serial sections with tumors from *Ikk $\beta$ (EE)<sup>IEC</sup>* mice. (C) p53 expression in tumor and adjacent nontumor tissue of *Ikk $\beta$ (EE)<sup>IEC</sup>* mice. (D) Gene expression in tumors from four 1-y-old *Ikk $\beta$ (EE)<sup>IEC</sup>* mice relative to adjacent nontumor tissue. (E) IHC for p53 and Sox9 of sequential sections with tumors from 12-mo-old *Ikk $\beta$ (EE)<sup>IEC</sup>* mice.

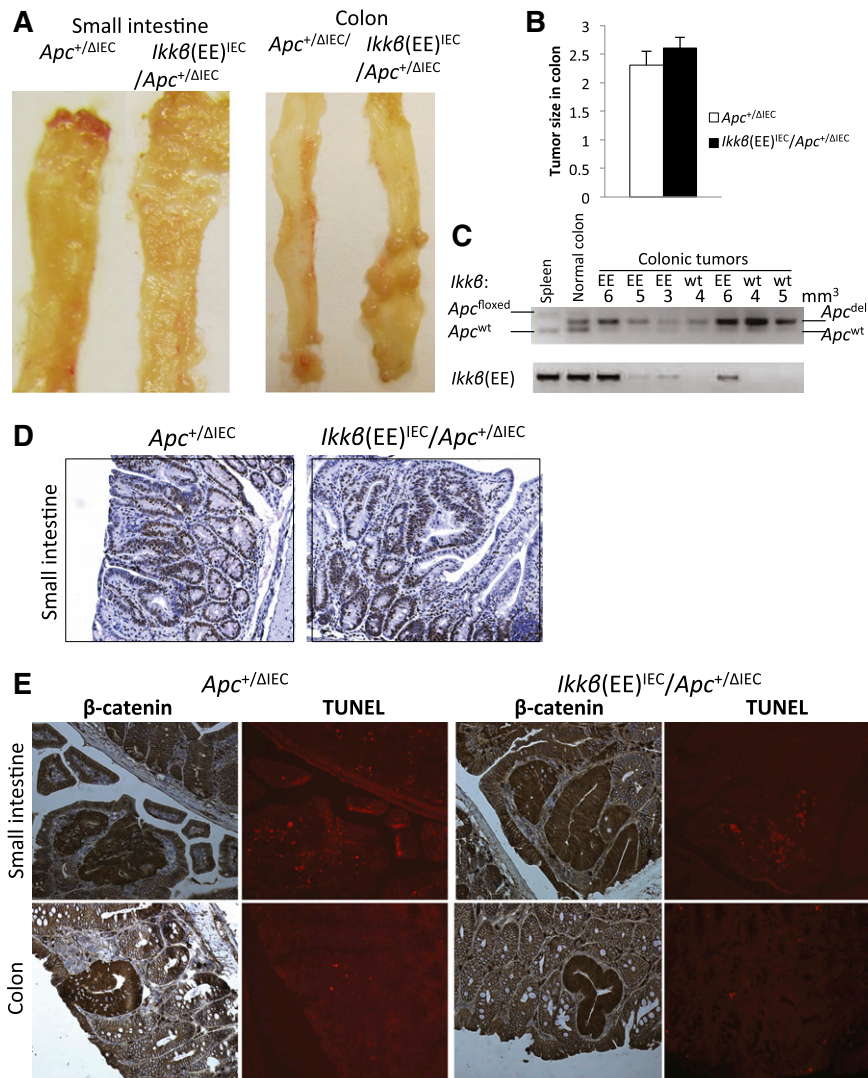

**Fig. S2.** Tumors and premalignant lesions in  $Ikk\beta(EE)^{IE C}/Apc^{+/\Delta IE C}$  and  $Apc^{+/\Delta IE C}$  mice. (A) Tumors in small intestine (SI) and colons of  $Ikk\beta(EE)^{IE C}/Apc^{+/\Delta IE C}$  and  $Apc^{+/\Delta IE C}$  mice. (B) Diameter (millimeters) of colonic tumors in  $Ikk\beta(EE)^{IE C}/Apc^{+/\Delta IE C}$  and  $Apc^{+/\Delta IE C}$  mice. (C) Loss of the WT *Apc* allele in colonic tumors from  $Ikk\beta(EE)^{IE C}/Apc^{+/\Delta IE C}$  and  $Apc^{+/\Delta IE C}$  3-mo-old mice. (D) Immunohistochemistry (IHC) analysis with Ki67 antibody of premalignant lesions in 6-wk-old mice of the indicated genotypes. (E) β-Catenin IHC and in situ TUNEL assay were performed on sequential sections containing premalignant lesions of 6-wk-old mice of the indicated genotypes.

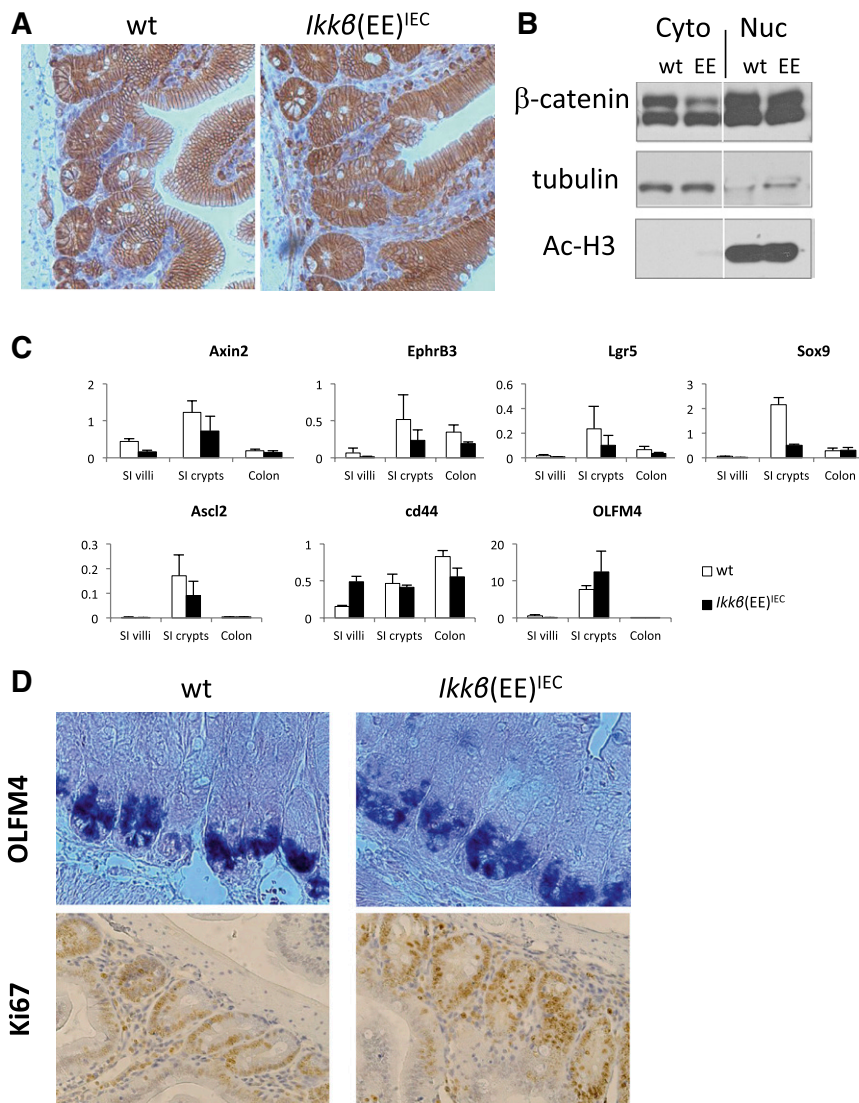

**Fig. S3.** *Ikkβ(EE)<sup>IEC</sup>* mice do not exhibit  $\beta$ -catenin activation or elevated stem cell numbers. (A) IHC for  $\beta$ -catenin in SI of 2-mo-old WT and *Ikkβ(EE)<sup>IEC</sup>* mice. (B) Immunoblot analysis of nuclear and cytoplasmic fractions from SI crypt cells of WT and *Ikkβ(EE)<sup>IEC</sup>* mice. (C) qRT-PCR analysis of  $\beta$ -catenin target genes in RNA isolated from intestinal epithelial cells (IECs) of SI villi, SI crypts, or colonic crypts of 2-mo-old WT and *Ikkβ(EE)<sup>IEC</sup>* mice; normalized to the Hprt gene. (D) In situ hybridization for the stem cell marker OLFM4 and IHC analysis of the proliferation marker Ki67 in SI of 2-mo-old WT and *Ikkβ(EE)<sup>IEC</sup>* mice.

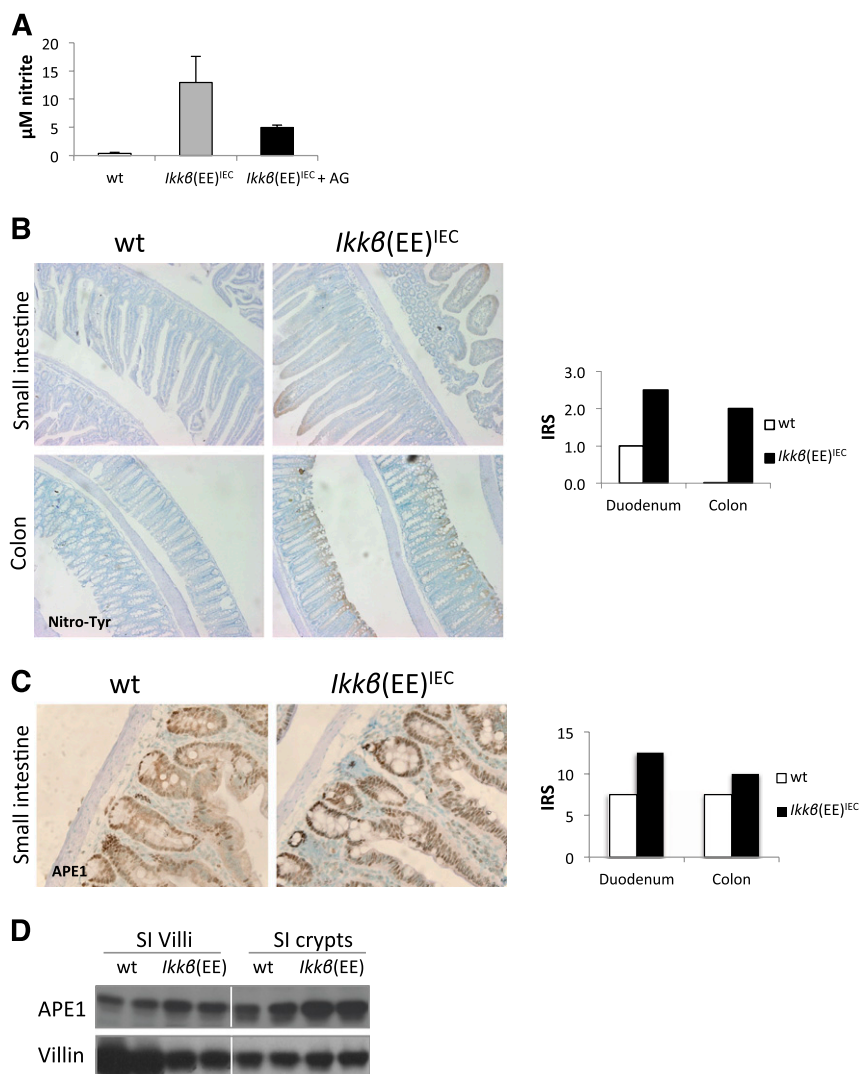

**Fig. S4.** Nitrosative stress and DNA repair in unchallenged *Ikkβ*(EE)<sup>IEC</sup> mice. (A) Nitrite levels in ultra-filtered plasma as measured by Griess reaction, in WT and *Ikkβ*(EE)<sup>IEC</sup> mice and *Ikkβ*(EE)<sup>IEC</sup> mice treated with 2g/L of aminoguanidine (AG) in drinking water for 24 h (*n* = 3). (B) IHC of intestinal sections from 2-mo-old WT and *Ikkβ*(EE)<sup>IEC</sup> mice with nitrotyrosine antibody. (C) IHC of SI sections from 2-mo-old mice with APE1 antibody and blind immunoreactivity score (IRS) of APE1 staining in SI and colon of WT and *Ikkβ*(EE)<sup>IEC</sup> mice. (D) Immunoblot analysis of APE1 in SI villi and crypts of 2-mo-old WT and *Ikkβ*(EE)<sup>IEC</sup> mice.
